# Supplementary material for: 6% Hydroxyethyl starch (HES 130/0.4) diminishes glycocalyx degradation and decreases vascular permeability during systemic and pulmonary inflammation in mice
Source: Springer Nature journal article supplement (doi:10.1186/s13054-017-1846-3), 2018-05-01

# Figure S2

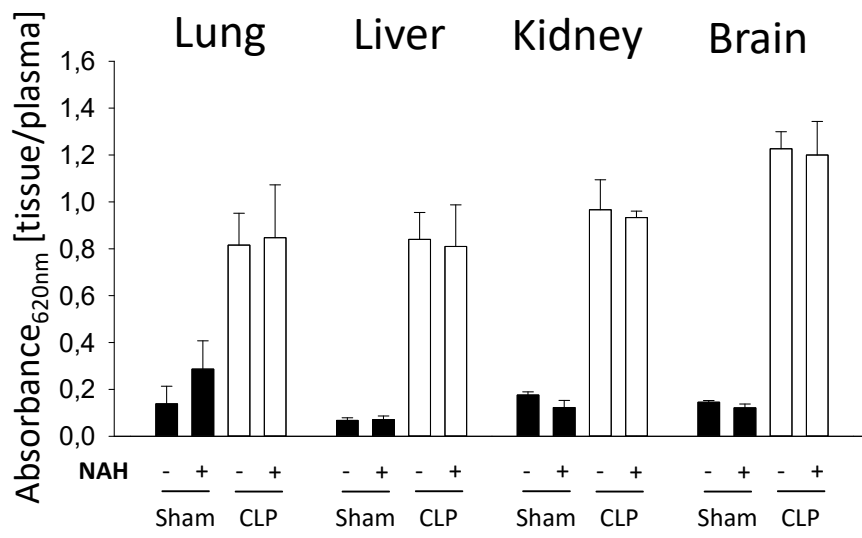

Supplement: MOESM2 [file 15731182]
