# Supplementary material for: 6% Hydroxyethyl starch (HES 130/0.4) diminishes glycocalyx degradation and decreases vascular permeability during systemic and pulmonary inflammation in mice
Source: Springer Nature journal article supplement (doi:10.1186/s13054-017-1846-3), 2018-05-01

# Figure S3

**A**

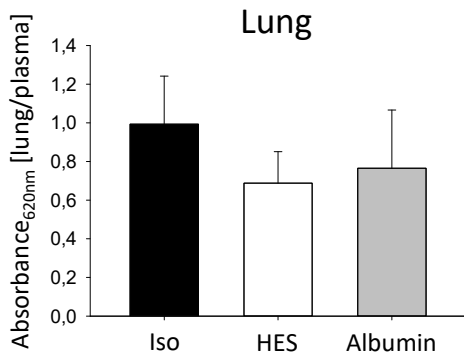

**B**

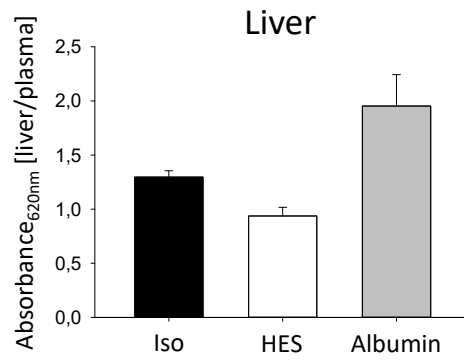

**C**

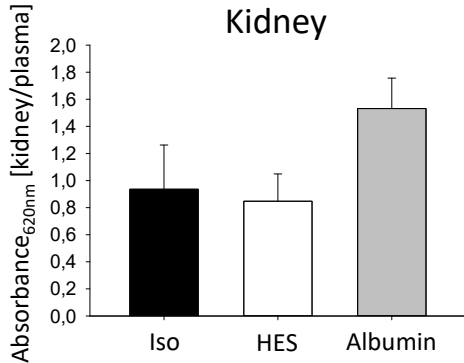

**D**

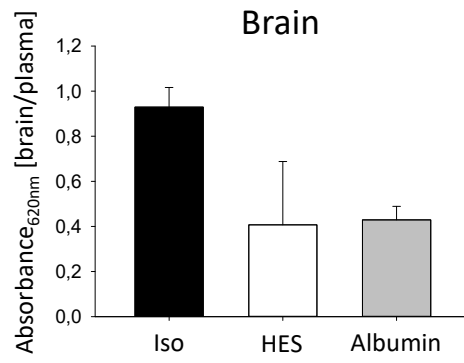

**E**

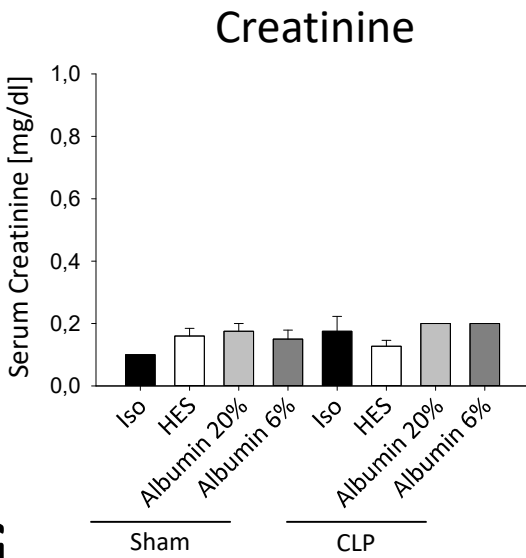

**F**

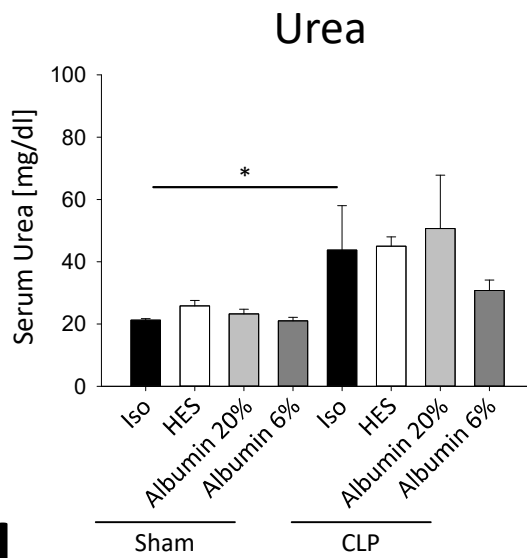

**G**

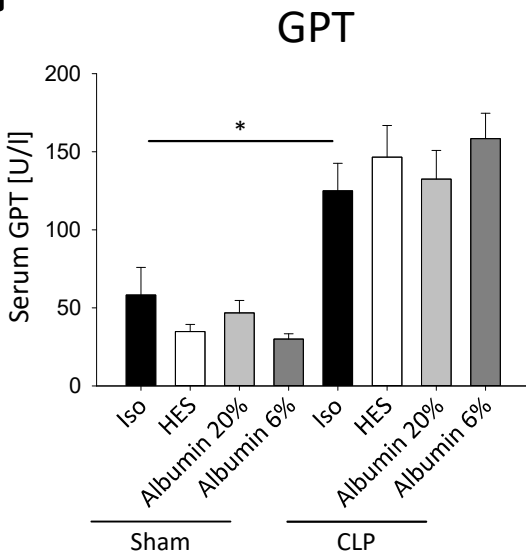

**H**

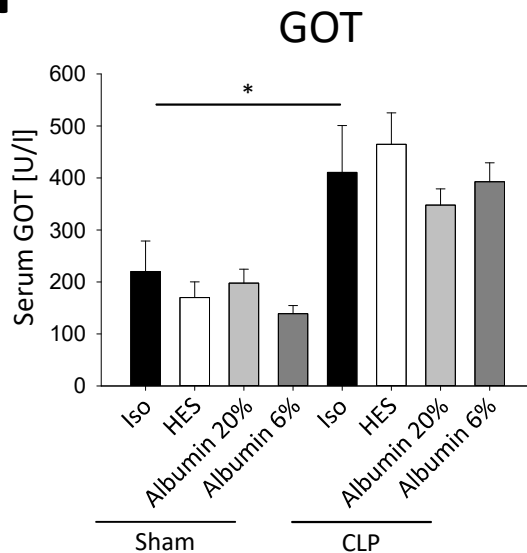

Supplement: MOESM3 [file 15731182]
